# Supplementary material for: The Effect of Food Unit Sizes and Meal Serving Occasions on Eating Behaviour Characteristics: Within Person Randomised Crossover Studies on Healthy Women
Source: MDPI journal article supplement (doi:10.3390/nu10070880), 2018-07-08
Supplement: s1 [file s1]

# Supplementary material - Tables

## Group characteristics (all studies)

Table 1. Group characteristics for the three studies.

|                        | Study 1 (n = 19) | Study 2 (n = 18) | Study 3 (n = 28) |
|------------------------|------------------|------------------|------------------|
| Age, y                 | 22.5 (1.8)       | 25.9 (4.7)       | 24.4 (2.7)       |
| Weight, kg             | 59.1 (5.6)       | 60.7 (7.8)       | 60.9 (6.2)       |
| Height, cm             | 167.3 (4.7)      | 164.1 (5.4)      | 164.4 (6.1)      |
| BMI, kg/m <sup>2</sup> | 21.1 (1.6)       | 22.5 (2.2)       | 22.5 (2.0)       |

Values are expressed as mean (SD)

## Macronutrient composition of meals

Table 2. Macronutrient composition of foods served.

|                     | Hash 1       | Hash 2       | Meat & Potatoes |
|---------------------|--------------|--------------|-----------------|
| Protein, g/100      | 9.6          | 9.1          | 9.4             |
| Carbohydrate, g/100 | 8.2          | 7.8          | 8.5             |
| Fat, g/100          | 2.0          | 2.8          | 6.8             |
| Energy, kcal (kJ)   | 91.7 (383.3) | 92.8 (387.9) | 140.1 (585.6)   |

## Eating behaviour characteristics of control meals (all studies)

Table 3. Group characteristics for the three studies.

|                    | Study 1       | Study 2       | Study 3     |
|--------------------|---------------|---------------|-------------|
| Food intake, g     | 310.8 (79.5)  | 256.7 (101.8) | 310 (108)   |
| Meal duration, min | 10.9 (3.3)    | 10.1 (5.9)    | 10.2 (3.6)  |
| Bites, n           | 57.4 (25.6)   | 56.9 (24.3)   | 49.2 (17.9) |
| Chews, n           | 742.6 (256.2) | 765.2 (419.0) | 802 (316)   |

Values are expressed as mean (SD)

## Eating behaviour characteristics of test meals (all studies)

Table 4. Eating behaviour characteristics in all studies.

|                           | Study 1     |             |             | Study 2     |             | Study 3     |             |
|---------------------------|-------------|-------------|-------------|-------------|-------------|-------------|-------------|
|                           | Small       | Medium      | Large       | Small       | Large       | Lunch       | Dinner      |
| <b>Food intake, g</b>     | 304 (116)   | 300 (92)    | 312 (107)   | 309 (98)    | 301 (101)   | 310 (108)   | 315 (112)   |
| <b>Meal duration, min</b> | 9.4 (3.4)   | 9.7 (3.5)   | 10.5 (3.2)  | 8.3 (4.7)   | 9.2 (6.1)   | 10.2 (3.6)  | 10.4 (3.6)  |
| <b>Bites, n</b>           | 54.4 (24.4) | 54.5 (24.7) | 61.9 (29.6) | 36.8 (11.1) | 36.5 (13.6) | 49.2 (17.9) | 50.8 (19.1) |
| <b>Chews, n</b>           | 566 (212)   | 626 (238)   | 662 (195)   | 471 (251)   | 567 (383)   | 802 (316)   | 808 (315)   |

Values are expressed as mean (SD)

## Eating behaviour differences

### Study 1

Table 5. Difference in eating behaviour characteristics between conditions in study 1.

|                           | Small - Medium |       |       |               | Medium - Large |       |       |              | Small - Large |       |        |                |
|---------------------------|----------------|-------|-------|---------------|----------------|-------|-------|--------------|---------------|-------|--------|----------------|
|                           | Mean           | SD    | P     | 95% CI        | Mean           | SD    | P     | 95% CI       | Mean          | SD    | P      | 95% CI         |
| <b>Food intake, g</b>     | 4.3            | 72.8  | 0.950 | -28.8 - 37.4  | -7.2           | 55.7  | 0.741 | -44.4 - 23.2 | -9.4          | 50.8  | 0.900  | -40.1 - 27.5   |
| <b>Meal duration, min</b> | -0.3           | 2.1   | 0.804 | -1.3 - 0.8    | -0.6           | 2.0   | 0.339 | -1.7 - 0.4   | -1.0          | 1.8   | 0.107  | -2.0 - 0.1     |
| <b>Bites, n</b>           | -0.2           | 17.0  | 0.999 | -8.6 - 8.3    | -6.2           | 15.5  | 0.144 | -15.6 - 1.7  | -7.8          | 14.2  | 0.132  | -15.7 - 1.6    |
| <b>Chews, n</b>           | -60.4          | 152.8 | 0.120 | -132.2 - 11.5 | -18.3          | 138.2 | 0.712 | -97.8 - 47.7 | -88.4         | 101.7 | 0.018* | -158.2 - -11.7 |

### Study 2

Table 6. Difference in eating behaviour characteristics between conditions in study 2.

|                           | Small - Large |       |        |                |
|---------------------------|---------------|-------|--------|----------------|
|                           | Mean          | SD    | P      | 95% CI         |
| <b>Food intake, g</b>     | 8.6           | 61.7  | 0.562  | -22.1 - 39.3   |
| <b>Meal duration, min</b> | -0.9          | 1.8   | 0.046* | -1.8 - -0.0    |
| <b>Bites, n</b>           | 0.3           | 11.2  | 0.918  | -5.3 - 5.9     |
| <b>Chews, n</b>           | -95.4         | 167.8 | 0.027* | -178.9 - -12.0 |

### Study 3

Table 7. Difference in eating behaviour characteristics between conditions in study 3.

|                           | Lunch - Dinner |       |       |              |
|---------------------------|----------------|-------|-------|--------------|
|                           | Mean           | SD    | P     | 95% CI       |
| <b>Food intake, g</b>     | -3.2           | 73.6  | 0.819 | -31.7 - 25.3 |
| <b>Meal duration, min</b> | -0.1           | 1.6   | 0.651 | -0.8 - 0.5   |
| <b>Bites, n</b>           | -0.6           | 10.2  | 0.766 | -4.6 - 3.5   |
| <b>Chews, n</b>           | -6.8           | 137.7 | 0.799 | -61.3 - 47.7 |

### Association of eating behaviour characteristics

Table 8. Pearson correlation coefficient ( $R^2$ ) of meal duration, food intake, bites and chews in all studies.

|                      | Study 1        |               |                | Study 2       | Study 3        |
|----------------------|----------------|---------------|----------------|---------------|----------------|
|                      | Small - Medium | Small - Large | Medium - Large | Small - Large | Lunch - Dinner |
| <b>Food intake</b>   | 0.78 (<0.01)   | 0.90 (<0.01)  | 0.85 (<0.01)   | 0.81 (<0.01)  | 0.79 (<0.01)   |
| <b>Meal duration</b> | 0.81 (<0.01)   | 0.86 (<0.01)  | 0.82 (<0.01)   | 0.98 (<0.01)  | 0.90 (<0.01)   |
| <b>Bites</b>         | 0.76 (<0.01)   | 0.88 (<0.01)  | 0.85 (<0.01)   | 0.60 (<0.01)  | 0.86 (<0.01)   |
| <b>Chews</b>         | 0.78 (<0.01)   | 0.88 (<0.01)  | 0.80 (<0.01)   | 0.94 (<0.01)  | 0.91 (<0.01)   |

Values are expressed as  $R^2$  (p-value)

### Subjective scores

Table 9. Before and after meal questions in all studies.

|                    | Study 1     |             |             | Study 2     |             | Study 3     |             |
|--------------------|-------------|-------------|-------------|-------------|-------------|-------------|-------------|
|                    | Small       | Medium      | Large       | Small       | Large       | Lunch       | Dinner      |
| <b>Before meal</b> |             |             |             |             |             |             |             |
| Hunger             | 82.7 (17.0) | 81.6 (19.5) | 85.5 (19.7) | 53.3 (26.9) | 54.4 (27.8) | 77.0 (15.5) | 72.9 (16.6) |
| Desire to eat      | 81.3 (17.8) | 81.6 (21.2) | 84.3 (21.8) | 62.7 (25.0) | 57.8 (23.4) | 78.2 (16.1) | 72.8 (17.4) |
| <b>After meal</b>  |             |             |             |             |             |             |             |
| Hunger             | 12.5 (16.0) | 12.3 (13.5) | 9.8 (11.5)  | 5.7 (8.1)   | 5.8 (7.8)   | 10.7 (11.2) | 8.9 (9.3)   |
| Desire to eat      | 20.4 (20.0) | 20.8 (19.7) | 19.6 (16.2) | 10.7 (12.8) | 11.8 (13.9) | 15.8 (14.7) | 16.5 (14.9) |

|             |             |             |             |             |             |             |             |
|-------------|-------------|-------------|-------------|-------------|-------------|-------------|-------------|
| Food liking | 54.6 (21.6) | 58.3 (12.5) | 56.8 (20.9) | 47.4 (21.4) | 48.1 (19.1) | 67.8 (17.8) | 62.9 (22.1) |
|-------------|-------------|-------------|-------------|-------------|-------------|-------------|-------------|

Values range between 0 and 100 on a Visual Analogue Scale

## Subjective score difference

### Study 1

Table 10. Difference in before and after meal ratings between conditions in study 1.

|                    | Small - Medium |      |       |             | Medium - Large |      |       |              | Small - Large |      |       |              |
|--------------------|----------------|------|-------|-------------|----------------|------|-------|--------------|---------------|------|-------|--------------|
|                    | Mean           | SD   | P     | 95% CI      | Mean           | SD   | P     | 95% CI       | Mean          | SD   | P     | 95% CI       |
| <b>Before meal</b> |                |      |       |             |                |      |       |              |               |      |       |              |
| Hunger             | 1.1            | 14.7 | 0.937 | -8.6 - 6.4  | -4.0           | 14.0 | 0.432 | -3.6 - 11.7  | -3.1          | 13.4 | 0.641 | -4.7 - 10.6  |
| Desire to eat      | -0.3           | 12.5 | 0.995 | -7.3 - 8.0  | -2.9           | 12.8 | 0.647 | -4.8 - 10.8  | -3.4          | 17.3 | 0.587 | -4.5 - 11.1  |
| <b>After meal</b>  |                |      |       |             |                |      |       |              |               |      |       |              |
| Hunger             | 0.2            | 9.3  | 0.996 | -4.7 - 4.3  | 1.2            | 6.8  | 0.879 | -5.5 - 3.6   | 0.6           | 8.6  | 0.840 | -5.7 - 3.5   |
| Desire to eat      | -0.5           | 11.9 | 0.989 | -7.2 - 8.2  | -0.1           | 16.9 | 1.000 | -7.8 - 7.9   | -0.9          | 13.8 | 0.988 | -7.3 - 8.3   |
| Food liking        | -3.7           | 24.1 | 0.774 | -9.0 - 16.3 | 0.7            | 19.7 | 0.967 | -10.5 - 15.2 | -2.2          | 26.6 | 0.905 | -14.2 - 11.5 |

Values range between 0 and 100 on a Visual Analogue Scale

### Study 2

Table 11. Difference in before and after meal ratings between conditions in study 2.

|                    | Small - Large |      |       |              |
|--------------------|---------------|------|-------|--------------|
|                    | Mean          | SD   | P     | 95% CI       |
| <b>Before meal</b> |               |      |       |              |
| Hunger             | -1.1          | 25.0 | 0.853 | -13.5 - 11.3 |
| Desire to eat      | 4.9           | 17.3 | 0.246 | -3.7 - 13.5  |
| <b>After meal</b>  |               |      |       |              |
| Hunger             | -0.1          | 8.4  | 0.956 | -4.3 - 4.1   |
| Desire to eat      | -1.1          | 11.6 | 0.660 | -6.9 - 4.7   |
| Food liking        | -0.7          | 17.3 | 0.872 | -9.3 - 7.9   |

Values range between 0 and 100 on a Visual Analogue Scale

### Study 3

Table 12. Difference in before and after meal ratings between conditions in study 3.

|                    | Lunch - Dinner |      |       |             |
|--------------------|----------------|------|-------|-------------|
|                    | Mean           | SD   | P     | 95% CI      |
| <b>Before meal</b> |                |      |       |             |
| Hunger             | 4.1            | 17.9 | 0.239 | -2.9 - 11.0 |
| Desire to eat      | 5.4            | 14.5 | 0.060 | -0.2 - 11.0 |
| <b>After meal</b>  |                |      |       |             |
| Hunger             | 1.8            | 9.8  | 0.344 | -2.0 - 5.6  |
| Desire to eat      | -0.7           | 15.1 | 0.814 | -6.5 - 5.2  |
| Food liking        | 5.0            | 13.0 | 0.053 | -0.1 - 10.0 |

Values range between 0 and 100 on a Visual Analogue Scale
