# Supplementary material for: The Effect of Food Unit Sizes and Meal Serving Occasions on Eating Behaviour Characteristics: Within Person Randomised Crossover Studies on Healthy Women
Source: Nutrients. 2018 Jul 8;10(7):880. doi: 10.3390/nu10070880 (PMC6073387; doi:10.3390/nu10070880)
Supplement: Supplementary file 1 [file nutrients-10-00880-s001.zip › Dataset S2 Research data.xlsx]

## Sheet: Sheet1
Study	ID	Condition	Sex	Height	Weight	Age	Meal duration	Meal intake	Bites	Chews	BM Desire to eat	BM Hunger	AM Desire to eat	AM Hunger	AM Food liking
1	1	Control	Female	172	61	22	14.35	330	47	1170	85	80	21	14	92
1	1	Small	Female	172	60.1	22	12.6833	342	62	786	80	72	24	10	64
1	1	Medium	Female	172	61.3	22	10.2833	284	45	645	83	70	29	8	63
1	1	Large	Female	172	61	22	11.6667	323	45	756	93	99	22	18	72
1	2	Control	Female	167	56.4	19	13.0167	262	32	778	78	68	35	13	48
1	2	Small	Female	167	56.9	19	16.7333	390	46	923	84	80	32	4	38
1	2	Medium	Female	167	56.8	19	17.4833	326	41	1018	83	68	35	20	53
1	2	Large	Female	167	56.9	19	17.4	303	47	1027	81	82	15	0	92
1	3	Control	Female	169	57.3	23	7.43333	355	49	486	94	96	31	23	50
1	3	Small	Female	169	58.1	23	6.4	332	59	418	89	88	52	51	55
1	3	Medium	Female	169	58.4	23	4.18333	209	33	302	85	84	46	37	72
1	3	Large	Female	169	58.8	23
1	7	Control	Female	174	61.7	21	6.91667	280	32	522	89	86	45	22	79
1	7	Small	Female	174	61.1	21	7.88333	252	32	584	60	47	35	45	75
1	7	Medium	Female	174	61.2	21	6.85	273	37	533	48	85	30	29	62
1	7	Large	Female	174	61.5	21	8.66667	307	42	611	36	54	29	22	69
1	9	Control	Female	169	67.9	21	15.7	353	89	1015	93	95	26	11	67
1	9	Small	Female	169	68.9	21	6.5	211	42	368	97	96	52	26	46
1	9	Medium	Female	169	68.8	21	11.9667	349	80	758	94	92	37	25	45
1	9	Large	Female	169	69.6	21	9.91667	261	59	577	94	93	28	27	37
1	10	Control	Female	166	67.5	21	6.21667	212	20	473	95	96	9	7	48
1	10	Small	Female	166	66.9	21	8.95	218	29	609	70	87	32	30	36
1	10	Medium	Female	166	68.8	21	11.75	328	38	824	99	99	35	45	63
1	10	Large	Female	166	68.4	21	9.78333	283	35	709	97	98	54	38	21
1	11	Control	Female	170	59.3	26	9.76667	306	87	838	86	92	11	9	47
1	11	Small	Female	170	59.4	26	8.65	365	104	638	83	91	12	8	72
1	11	Medium	Female	170	61.1	26	7.7	340	90	554	86	83	2	4	66
1	11	Large	Female	170	60.9	26	9.88333	370	120	717	77	88	35	3	70
1	12	Control	Female	164	50	23	13.3833	399	55	762	99	97	2	2	74
1	12	Small	Female	164	49.6	23	9.96667	275	40	421	98	99	3	3	56
1	12	Medium	Female	164	48.6	23	8.16667	238	32	385	97	95	15	14	42
1	12	Large	Female	164	49.4	23	9.48333	245	54	479	96	97	4	20	63
1	13	Control	Female	166	54.7	24	9.08333	249	35	723	88	87	30	19	70
1	13	Small	Female	166	53.6	24	5.25	177	25	390	76	75	42	31	77
1	13	Medium	Female	166	54.4	24	7.48333	257	36	583	89	87	21	19	65
1	13	Large	Female	166	53.2	24	8.16667	215	33	553	75	83	41	22	64
1	14	Control	Female	160	55.2	23	10.6333	157	44	668	96	97	2	3	78
1	14	Small	Female	160	54.6	23	12.3667	177	50	632	98	99	1	2	71
1	14	Medium	Female	160	54.8	23	11.4167	174	50	662	98	98	3	2	68
1	14	Large	Female	160	55.1	23	14.8833	247	74	833	98	85	1	1	65
1	15	Control	Female	169	53.6	21	8.4	372	56	661	96	76	8	15	64
1	15	Small	Female	169	53.7	21	8.76667	491	72	594	97	96	1	0	72
1	15	Medium	Female	169	54.3	21	7.08333	383	47	560	90	80	11	7	42
1	15	Large	Female	169	54.5	21	8.95	394	49	655	93	90	3	1	29
1	18	Control	Female	167	56.8	22	13	351	111	922	91	81	25	3	71
1	18	Small	Female	167	56.9	22	10.85	288	65	592	64	65	5	4	77
1	18	Medium	Female	167	56.4	22	8.96667	324	66	544	88	83	26	13	65
1	18	Large	Female	167	55.9	22	10.7667	320	74	713	90	88	26	4	39
1	19	Control	Female	160	57	24	12.6833	341	92	1033	97	97	0	0	44
1	19	Small	Female	160	56.4	24	9.43333	308	51	496	79	77	3	2	71
1	19	Medium	Female	160	56.3	24	11.7	409	91	900	77	73	0	0	58
1	19	Large	Female	160	55.7	24	9.16667	329	72	656	99	99	3	2	75
1	20	Control	Female	172	63	26	10.8	263	86	679	60	64	1	0	69
1	20	Small	Female	172	62	26	8.15	249	58	492	91	88	2	2	18
1	20	Medium	Female	172	61.9	26	7.68333	206	55	493	68	70	0	2	90
1	20	Large	Female	172	63.3	26	11.5	298	95	715	71	66	0	2	76
1	21	Control	Female	174	71.3	21	9.13333	213	42	565	98	98	55	2	57
1	21	Small	Female	174	72.4	21	6.13333	224	42	378	51	89	57	3	45
1	21	Medium	Female	174	72.1	21	8.48333	245	39	488	52	76	75	1	48
1	21	Large	Female	174	73.6	21	8.46667	257	39	478	95	98	34	6	29
1	22	Control	Female	167	61.5	24	17.45	363	52	1261	100	96	5	0	45
1	22	Small	Female	167	61.5	24	14.7667	372	56	987	100	97	7	2	71
1	22	Medium	Female	167	61.3	24	14.2	338	55	1002	99	98	19	0	48
1	22	Large	Female	167	61	24	11.45	311	61	771	100	99	26	3	74
1	23	Control	Female	170	58.8	23	13.7333	508	87	766	96	95	28	7	81
1	23	Small	Female	170	58.6	23	13.75	641	122	898	100	99	23	13	58
1	23	Medium	Female	170	59.1	23	15.55	564	121	1031	96	97	1	1	64
1	23	Large	Female	170	59.8	23	17.2167	690	136	1027	98	96	24	1	72
1	24	Control	Female	157	51.6	22	7.66667	319	68	408	100	100	8	6	64
1	24	Small	Female	157	51.3	22	5.48333	264	46	309	89	87	0	0	0
1	24	Medium	Female	157	52.3	22	6.13333	242	51	326	99	99	1	0	41
1	24	Large	Female	157	51.7	22	6.01667	270	52	333	100	100	0	0	38
1	25	Control	Female	165	57.5	22	7.51667	273	37	402	56	49	22	13	46
1	25	Small	Female	165	57.9	22	5.31667	197	32	235	38	40	4	1	35
1	25	Medium	Female	165	57.9	22	6.35	202	29	289	19	14	10	7	52
1	25	Large	Female	165	56.9	22	5.85	188	27	314	24	24	7	6	37
2	3	Control	Female	168	63.7	21.6667	7.38333	384	58	599	33	26	4	3	27
2	3	Large (Meatballs)	Female	168	64.5	21.6667	7.96667	518	45	508	40	68	22	10	65
2	3	Small (Mincemeat)	Female	168	64.8	21.6667	6.15	451	58	322	57	26	3	2	52
2	5	Control	Female	162	56.1	23.1667	15.0333	336	77	1082	76	71	4	2	79
2	5	Large (Meatballs)	Female	162	56.7	23.1667	14.55	409	70	903	61	28	2	3	29
2	5	Small (Mincemeat)	Female	162	56.3	23.1667	12.8667	442	49	685	76	62	21	2	66
2	6	Control	Female	166	56.7	20.75	5.15	36	56	395	26	14	2	2	2
2	6	Large (Meatballs)	Female	166	56.1	20.75	7.76667	263	36	537	37	27	6	2	51
2	6	Small (Mincemeat)	Female	166	55.6	20.75	5.81667	186	34	349	52	37	2	3	51
2	7	Control	Female	162	70.4	21.5833	6.38333	212	62	512	65	69	3	4	61
2	7	Large (Meatballs)	Female	162	69.2	21.5833	7.03333	334	36	478	66	53	4	5	50
2	7	Small (Mincemeat)	Female	162	70.5	21.5833	6.38333	329	31	361	80	76	5	12	54
2	10	Control	Female	162	52.8	29.8333	13.7833	398	94	1345	88	89	12	1	90
2	10	Large (Meatballs)	Female	162	53.2	29.8333	8.76667	331	36	807	79	83	1	1	56
2	10	Small (Mincemeat)	Female	162	52.9	29.8333	9.1	428	57	809	93	95	7	3	77
2	12	Control	Female	157	51.2	27.9167	9.11667	255	55	586	76	76	1	1	65
2	12	Large (Meatballs)	Female	157	51	27.9167	7.56667	328	44	347	52	25	1	1	64
2	12	Small (Mincemeat)	Female	157	50.9	27.9167	8.41667	334	42	340	78	77	2	1	72
2	14	Control	Female	171	79.2	31.8333	30.12	218	82	2066	64	64	1	1	52
2	14	Large (Meatballs)	Female	171	78	31.8333	30.8667	330	43	1847	69	69	47	26	39
2	14	Small (Mincemeat)	Female	171	79.8	31.8333	25.1167	339	41	1189	80	82	31	28	50
2	15	Control	Female	169	57.4	23.6667	12.25	204	65	723	51	26	2	2	52
2	15	Large (Meatballs)	Female	169	57.7	23.6667	6.83333	122	17	297	51	25	2	2	28
2	15	Small (Mincemeat)	Female	169	57.9	23.6667	7.31667	156	23	278	52	27	3	3	51
2	16	Control	Female	155	54.3	25.25	13.8833	397	118	1055	98	78	2	2	51
2	16	Large (Meatballs)	Female	155	53.1	25.25	13.9	409	57	749	2	3	2	3	7
2	16	Small (Mincemeat)	Female	155	53.8	25.25	10.4167	381	39	711	2	3	2	3	7
2	17	Control	Female	173	74.3	23.4167	5.33333	146	32	371	51	51	24	3	28
2	17	Large (Meatballs)	Female	173	75.2	23.4167	4.01667	138	23	199	23	24	3	3	49
2	17	Small (Mincemeat)	Female	173	75.1	23.4167	3.9	180	32	211	51	26	24	25	39
2	21	Control	Female	161	61	22.3333	4.98333	145	32	365	75	57	40	3	59
2	21	Large (Meatballs)	Female	161	60.7	22.3333	6.18333	261	27	397	77	79	34	0	53
2	21	Small (Mincemeat)	Female	161	60.3	22.3333	4.86667	226	27	298	69	54	35	2	23
2	22	Control	Female	161	60	22.0833	4.86667	235	46	341	77	77	11	8	77
2	22	Large (Meatballs)	Female	161	60.6	22.0833	4.45	216	26	183	75	72	19	8	76
2	22	Small (Mincemeat)	Female	161	60.5	22.0833	5.85	296	36	263	76	63	13	5	68
2	23	Control	Female	172	62.2	21.25	10.8667	270	64	732	74	71	23	15	71
2	23	Large (Meatballs)	Female	172	61.8	21.25	7.43333	196	28	390	68	78	27	11	24
2	23	Small (Mincemeat)	Female	172	62.1	21.25	8	312	38	375	63	72	37	8	24
2	24	Control	Female	164	54.6	23.3333	9.28333	151	20	712	52	25	2	2	52
2	24	Large (Meatballs)	Female	164	53.9	23.3333	11.7167	305	29	864	76	77	24	1	76
2	24	Small (Mincemeat)	Female	164	54.9	23.3333	9.36667	195	19	661	25	25	1	1	51
2	25	Control	Female	157	56	35	8.36667	252	41	724	100	100	2	0	76
2	25	Large (Meatballs)	Female	157	55.2	35	7.2	267	31	422	86	90	0	0	67
2	25	Small (Mincemeat)	Female	157	54.4	35	7.45	322	31	501	95	84	0	0	64
2	26	Control	Female	160	59.6	27.1667	8.8	389	45	753	79	52	1	1	53
2	26	Large (Meatballs)	Female	160	59.2	27.1667	5.9	332	32	436	76	76	1	25	52
2	26	Small (Mincemeat)	Female	160	59.7	27.1667	6.65	390	44	446	78	52	2	1	52
2	28	Control	Female	163	54.6	32.9167	7.68333	266	35	683	76	63	4	12	39
2	28	Large (Meatballs)	Female	163	54.1	32.9167	5.78333	233	23	358	27	25	14	1	26
2	28	Small (Mincemeat)	Female	163	54.1	32.9167	4.31667	194	20	261	24	23	1	1	0
2	30	Control	Female	170	68.2	33.3333	8.78333	326	44	729	79	80	2	2	79
2	30	Large (Meatballs)	Female	170	68.5	33.3333	7.86667	417	54	486	76	78	3	3	53
2	30	Small (Mincemeat)	Female	170	69.1	33.3333	7.45	403	41	430	78	76	3	3	52
3	1	Lunch (Control)	Female	168	68.4	23.75	4.8	117	13	329	54	68	20	20	37
3	1	Dinner	Female	168	68.2	23.75	5.5	124	15	360	57	50	28	25	17
3	2	Lunch (Control)	Female	156	55.3	22.92	10.5	212	29	777	87	45	3	1	77
3	2	Dinner	Female	156	54.3	22.92	10.7	203	28	781	78	60	4	0	71
3	3	Lunch (Control)	Female	155	51.6	20.67	6.4	230	27	489	83	72	16	19	100
3	3	Dinner	Female	155	52.5	20.67	9.1	258	32	763	90	90	14	5	93
3	4	Lunch (Control)	Female	170	77.8	20.83	6.9	226	51	603	69	72	6	2	65
3	4	Dinner	Female	170	77.6	20.83	7.2	252	44	629	46	58	0	0	74
3	6	Lunch (Control)	Female	160	64.6	27.58	7.6	261	42	559	100	100	1	2	61
3	6	Dinner	Female	160	65.2	27.58	6.9	246	35	488	100	100	47	5	50
3	7	Lunch (Control)	Female	172	60.2	23.17	15.1	418	56	1293	100	88	0	0	80
3	7	Dinner	Female	172	60.4	23.17	13.8	367	44	1161	100	100	29	6	99
3	8	Lunch (Control)	Female	160	48.3	34.33	16.4	274	43	1600	99	100	37	7	69
3	8	Dinner	Female	160	48.7	34.33	15	266	48	1408	71	72	6	2	71
3	9	Lunch (Control)	Female	161	63.5	23.25	10.8	473	43	652	97	99	0	0	50
3	9	Dinner	Female	161	63.7	23.25	8	305	32	466	53	43	4	0	28
3	10	Lunch (Control)	Female	162	60.7	25.83	10.8	461	92	816	100	69	0	0	69
3	10	Dinner	Female	162	60.3	25.83	9.3	489	88	707	100	78	0	0	53
3	11	Lunch (Control)	Female	176	69	25.92	8.8	288	62	908	100	100	2	0	64
3	11	Dinner	Female	176	69.8	25.92	8.7	287	55	869	95	85	1	0	78
3	12	Lunch (Control)	Female	173	90.7	26.58	7.5	207	29	647	75	77	24	9	70
3	12	Dinner	Female	173	89.6	26.58	7.6	256	33	651	83	85	2	10	64
3	14	Lunch (Control)	Female	173	63.7	24	13.4	308	57	1229	87	82	5	2	88
3	14	Dinner	Female	173	64.1	24	12.9	333	57	1125	60	60	7	5	65
3	15	Lunch (Control)	Female	163	51.1	25.92	12.5	308	87	786	65	61	34	30	45
3	15	Dinner	Female	163	52.7	25.92	13.8	234	77	773	71	67	25	25	50
3	16	Lunch (Control)	Female	169	59.8	24.75	8	272	36	444	80	81	16	12	77
3	16	Dinner	Female	169	59.7	24.75	8	293	34	455	86	85	14	8	50
3	17	Lunch (Control)	Female	174	64.6	27.67	4.7	199	25	466	89	87	9	14	50
3	17	Dinner	Female	174	65.7	27.67	5.9	221	24	532	70	80	7	6	41
3	18	Lunch (Control)	Female	172	66.9	23.5	11.47	434	69	719	65	72	30	8	82
3	18	Dinner	Female	172	66.4	23.5	9.6	403	70	657	50	71	43	8	72
3	19	Lunch (Control)	Female	162	55.2	22.8	9.5	408	51	539	79	84	21	20	94
3	19	Dinner	Female	162	55.3	22.8	8.1	321	43	525	80	71	30	17	95
3	21	Lunch (Control)	Female	164	63.8	27.3	9.5	509	65	595	73	66	0	0	98
3	21	Dinner	Female	164	63.6	27.3	8.8	411	68	606	88	83	4	1	98
3	23	Lunch (Control)	Female	165	61.7	22.5	7.8	380	65	529	71	77	42	42	51
3	23	Dinner	Female	165	62.1	22.5	9.7	436	91	609	62	57	12	9	48
3	26	Lunch (Control)	Female	164	57.1	23.8	8.8	265	36	822	87	86	23	19	79
3	26	Dinner	Female	164	57.5	23.8	9.2	259	31	775	75	79	8	5	51
3	27	Lunch (Control)	Female	152	60.5	23.1	6.9	175	32	615	61	78	31	15	49
3	27	Dinner	Female	152	61	23.1	9.9	335	52	936	78	79	46	26	50
3	28	Lunch (Control)	Female	172	66.2	24.1	21.7	363	56	1477	87	92	50	26	87
3	28	Dinner	Female	172	65.8	24.1	22.1	390	68	1557	73	94	43	31	82
3	30	Lunch (Control)	Female	157	62.8	21.4	8.9	195	83	610	47	50	1	0	47
3	30	Dinner	Female	157	63	21.4	10.8	265	86	597	31	34	1	1	49
3	34	Lunch (Control)	Female	165	62.8	22.9	12.4	390	55	897	76	85	31	17	70
3	34	Dinner	Female	165	61.6	22.9	11.1	360	46	811	73	85	13	6	74
3	36	Lunch (Control)	Female	159	59.5	24.7	11.3	539	49	925	63	54	20	2	83
3	36	Dinner	Female	159	58.9	24.7	12.4	741	66	997	72	87	26	21	98
3	37	Lunch (Control)	Female	162	62	25.1	12.8	299	65	1122	83	81	7	8	72
3	37	Dinner	Female	162	63.1	25.1	17	391	81	1514	91	87	9	9	71
3	40	Lunch (Control)	Female	164	55.9	24.3	9.6	266	35	720	80	82	1	0	50
3	40	Dinner	Female	164	56	24.3	9.6	225	42	691	69	63	2	1	52
3	41	Lunch (Control)	Female	164	51.4	24.8	13	295	58	1105	47	48	23	24	41
3	41	Dinner	Female	164	51	24.8	12.4	265	55	1071	62	62	21	8	43
3	42	Lunch (Control)	Female	163	58.4	22	9.1	213	41	802	61	77	14	9	64
3	42	Dinner	Female	163	59.9	22	7.9	188	30	736	58	62	18	19	37
